# Supplementary material
Source: HighWire-hosted journal article supplement (https://bmjopen.bmj.com/content/8/5/e022162)
Supplement: inline-supplementary-material-1 [file inline-supplementary-material-1.pdf]

Supplemental table 1. Analysis the operating time undergone cyst excision and Roux-en-Y hepaticojejunostomy for children in four cohorts

| variable | Cohort A(11)  | Cohort B(12)  | Cohort C(13)  | Cohort D(29)  |
|----------|---------------|---------------|---------------|---------------|
| Mean±SD  | 236.27±79.233 | 235.42±84.972 | 233.08±70.045 | 227.24±80.073 |

Pair-wise comparison showed there is no significant difference between every two groups, Cohort A Vs Cohort B(p=1.0000) , Cohort A Vs Cohort C(p=0.8860) , Cohort A Vs Cohort D(p=0.5748) , Cohort B Vs Cohort C(p=0.9356), Cohort B Vs Cohort D(p=0.8973) and Cohort C Vs Cohort D(p=0.6435).
