# Supplementary material
Source: HighWire-hosted journal article supplement (https://bmjopen.bmj.com/content/8/5/e022162)
Supplement: inline-supplementary-material-2 [file inline-supplementary-material-2.pdf]

Supplemental table 2. Analysis the operating time between laparoscopic surgery and open surgery undergone cyst excision and Roux-en-Y hepaticojejunostomy

| group        | N  | mean± SD     | P value |
|--------------|----|--------------|---------|
| Laparoscopy  | 23 | 251.65±73.58 | 0.0825  |
| open surgery | 42 | 220.38±77.76 |         |

Wilcoxon two-sample test
